# Supplementary material for: Application of Iron Nanoparticles Synthesized from a Bioflocculant Produced by Yeast Strain Pichia kudriavzevii Obtained from Kombucha Tea SCOBY in the Treatment of Wastewater
Source: MDPI journal article supplement (doi:10.3390/ijms241914731), 2023-09-29
Supplement: s1 [file s1]

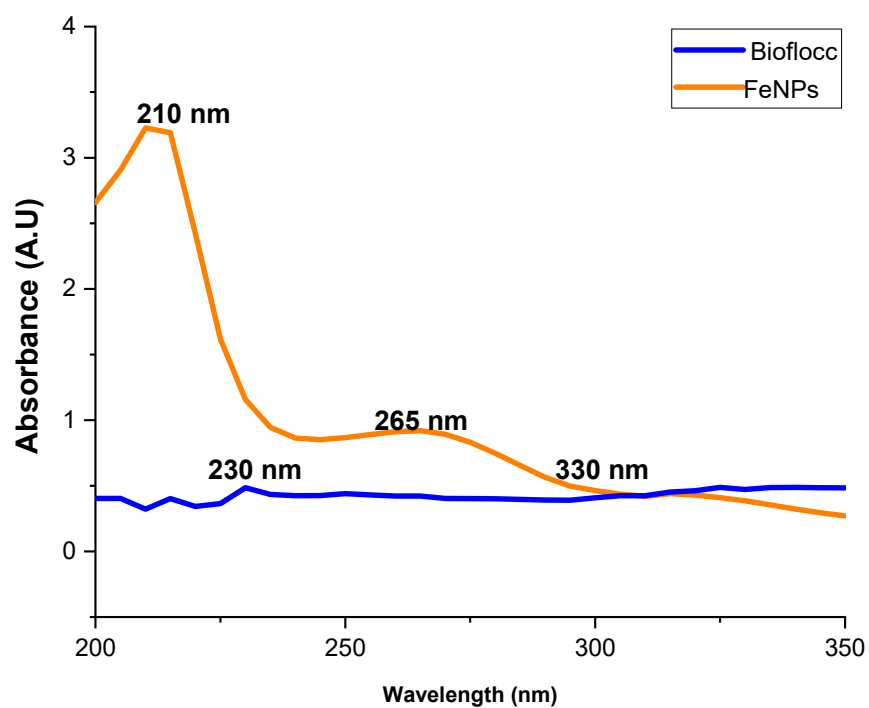

**Figure S1.** UV-Visible spectra of the biofloculant and as-prepared Fe nanoparticles.

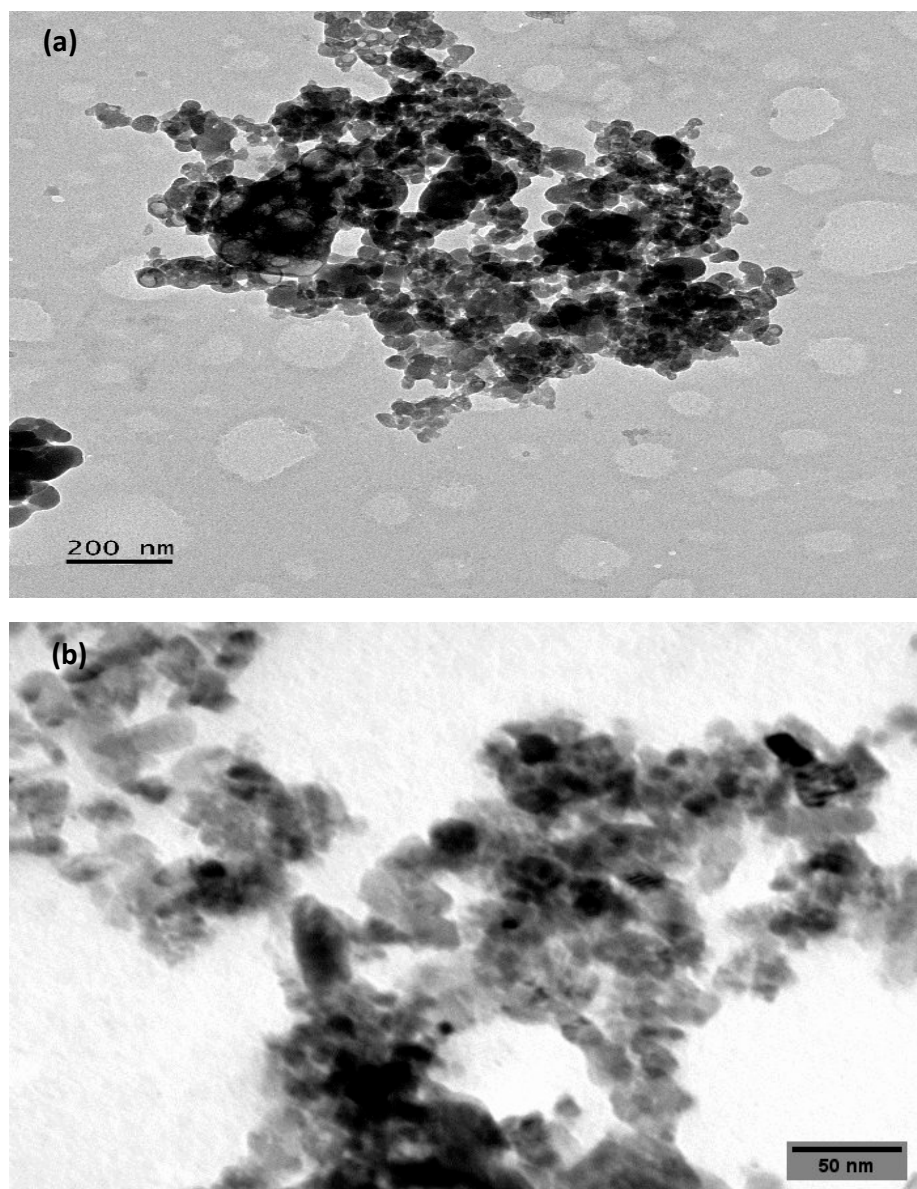

**Figure S2.** TEM micrographs of (a) biofloculant and (b) as-prepared Fe nanoparticles.

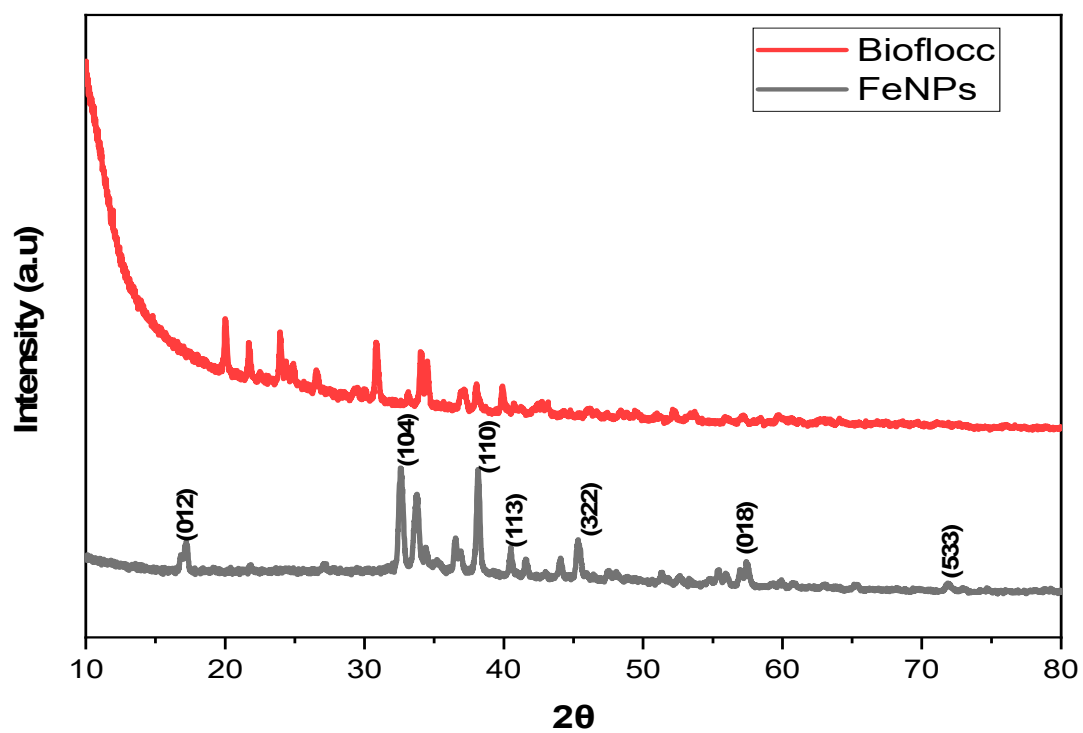

**Figure S3.** X-ray diffractogram of the biofloculant and as-prepared Fe nanoparticles.

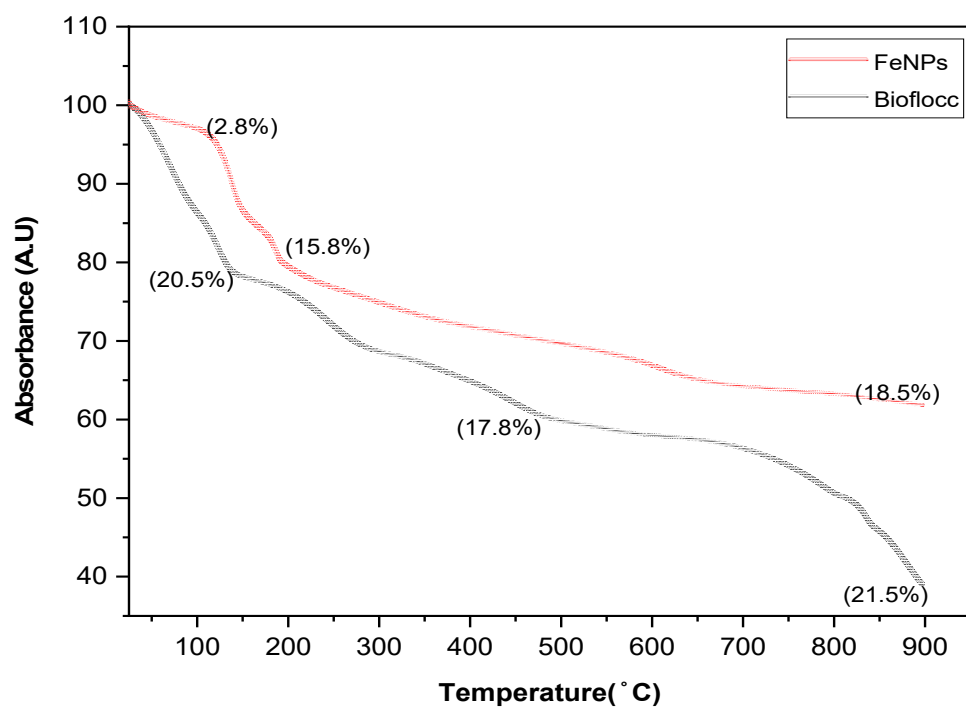

**Figure S4.** Thermogravimetric spectra of biofloculant and Fe nanoparticles.
